# Supplementary material for: Quantified Detection of Treponema pallidum DNA by PCR Assays in Urine and Plasma of Syphilis Patients
Source: PubMed Central journal article supplement (PMC9045283; doi:10.1128/spectrum.01772-21), 2022-03-22
Supplement: spectrum01772-21_supp_1_seq10.pdf [file spectrum01772-21_supp_1_seq10.pdf]

## Supplementary Figure 1

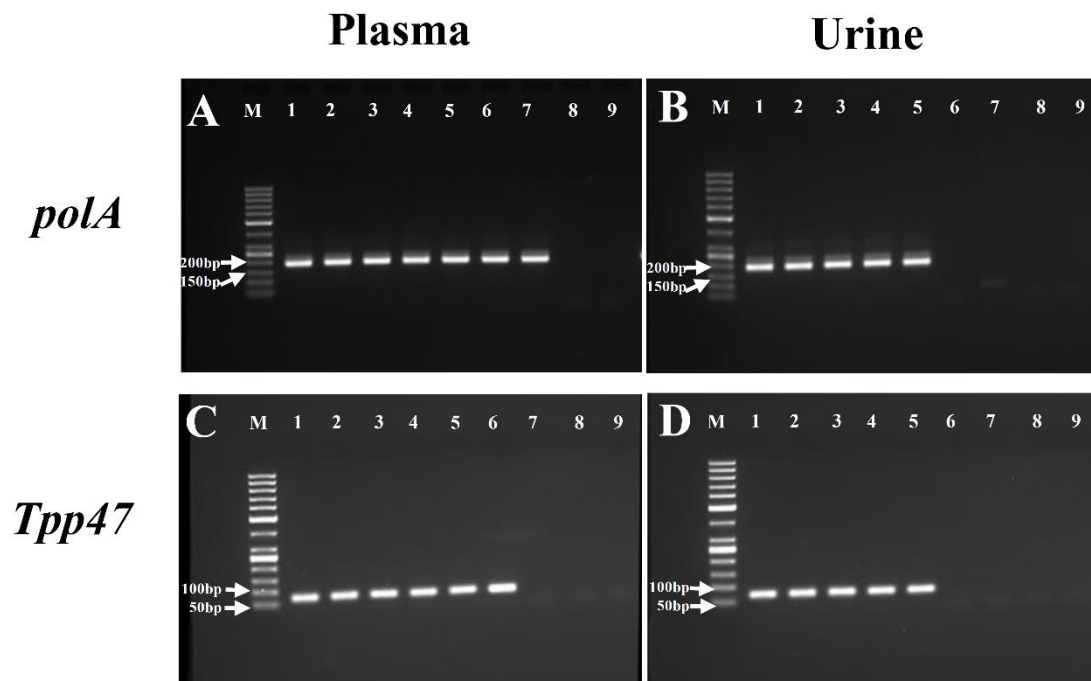

### Supplementary Figure 1 legend

#### The limit of detection of *polA* and *Tpp47* in plasma and urine by nPCR assay.

Different number of *T. pallidum* (Nichols strains) were diluted in plasma (A) and urine (B) and *polA* gene was detected by nPCR assay; Different number of *T. pallidum* (Nichols strains) were diluted in plasma (C) and urine (D) and *Tpp47* gene was detected by nPCR assay. M: marker; line 1,  $3 \times 10^4$  *T. pallidum*/mL; line 2,  $3 \times 10^3$  *T. pallidum*/mL; line 3,  $3 \times 10^2$  *T. pallidum*/mL; line 4,  $3 \times 50$  *T. pallidum*/mL; line 5,  $3 \times 10$  *T. pallidum*/mL; line 6,  $3 \times 5$  *T. pallidum*/mL; line 7, 3 *T. pallidum*/mL; line 8, 0.3 *T. pallidum*/mL; line 9, negative control (plasma or urine without *T. pallidum*).
